# Supplementary material for: Stereodivergent synthesis of the LFA-1 antagonist BIRT-377 by porcine liver esterase desymmetrization and Curtius rearrangement
Source: Royal Society of Chemistry journal article supplement (doi:10.1039/c4ob02303j), 2014-11-27

**ELECTRONIC SUPPLEMENTARY INFORMATION FOR**

**Stereodivergent Synthesis of the LFA-1 Antagonist BIRT 377 by Porcine Liver Esterase**

**Desymmetrization and Curtius Rearrangement**

Aaron Johnson, Matthew J. Saunders and Thomas G. Back\*

| <b>Contents</b>                                                                                                                 | <b>Page</b> |
|---------------------------------------------------------------------------------------------------------------------------------|-------------|
| <sup>1</sup> H and <sup>13</sup> C NMR Spectra of Compound <b>3</b>                                                             | ESI 2       |
| <sup>1</sup> H and <sup>13</sup> C NMR Spectra of Compound <b>4</b>                                                             | ESI 3       |
| <sup>1</sup> H NMR Spectrum of Racemic Half-Ester <b>4</b> with 1 Equiv of<br>( <i>R</i> )-(+)- $\alpha$ -Methylbenzylamine     | ESI 4       |
| <sup>1</sup> H NMR Spectrum of Enantiopure Half-Ester <b>4</b><br>with 1 Equiv of ( <i>R</i> )-(+)- $\alpha$ -methylbenzylamine | ESI 4       |
| <sup>1</sup> H and <sup>13</sup> C NMR Spectra of Compound <b>5</b>                                                             | ESI 5       |
| <sup>1</sup> H and <sup>13</sup> C NMR Spectra of Compound <b>6</b>                                                             | ESI 6       |
| <sup>1</sup> H and <sup>13</sup> C NMR Spectra of Compound <b>7</b>                                                             | ESI 7       |
| <sup>1</sup> H and <sup>13</sup> C NMR Spectra of Compound <b>8</b>                                                             | ESI 8       |
| <sup>1</sup> H and <sup>13</sup> C NMR Spectra of BIRT-377 ( <b>1</b> )                                                         | ESI 9       |
| <sup>1</sup> H and <sup>13</sup> C NMR Spectra of Compound <b>9</b>                                                             | ESI 10      |
| <sup>1</sup> H and <sup>13</sup> C NMR Spectra of Compound <b>10</b>                                                            | ESI 11      |
| <sup>1</sup> H and <sup>13</sup> C NMR Spectra of ( <i>ent</i> )-BIRT-377 ( <b>11</b> )                                         | ESI 12      |
| <sup>1</sup> H and <sup>13</sup> C NMR Spectra of Compound <b>12</b>                                                            | ESI 13      |
| <sup>1</sup> H and <sup>13</sup> C NMR Spectra of Compound <b>13</b>                                                            | ESI 14      |

**$^1\text{H}$  and  $^{13}\text{C}$  NMR Spectra of Compound 3 ( $\text{CDCl}_3$ )**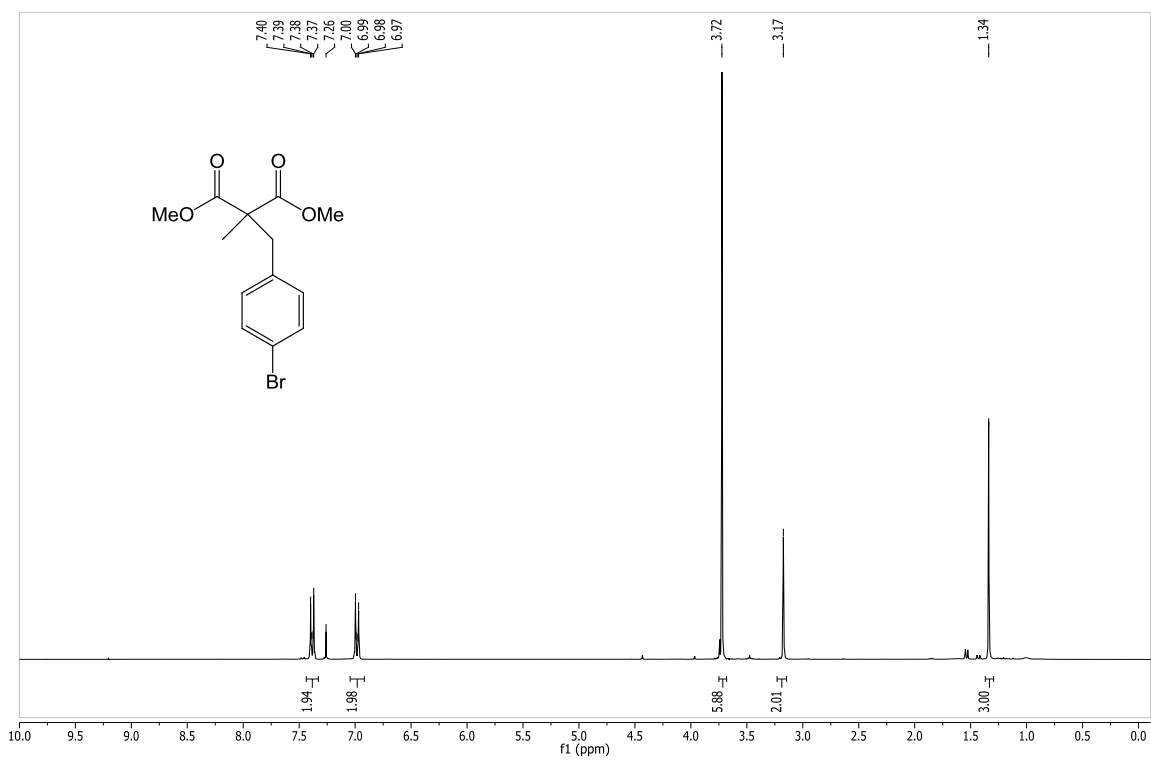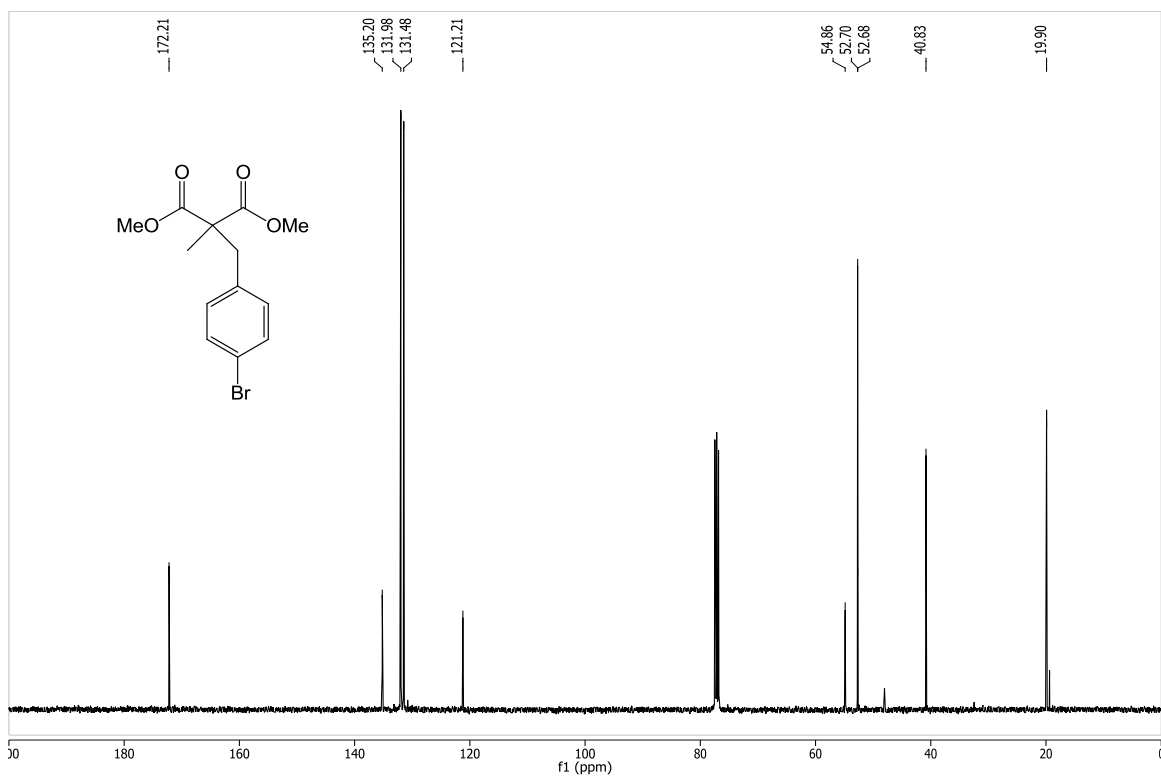

**$^1\text{H}$  and  $^{13}\text{C}$  NMR Spectra of Compound 4 ( $\text{CDCl}_3$ )**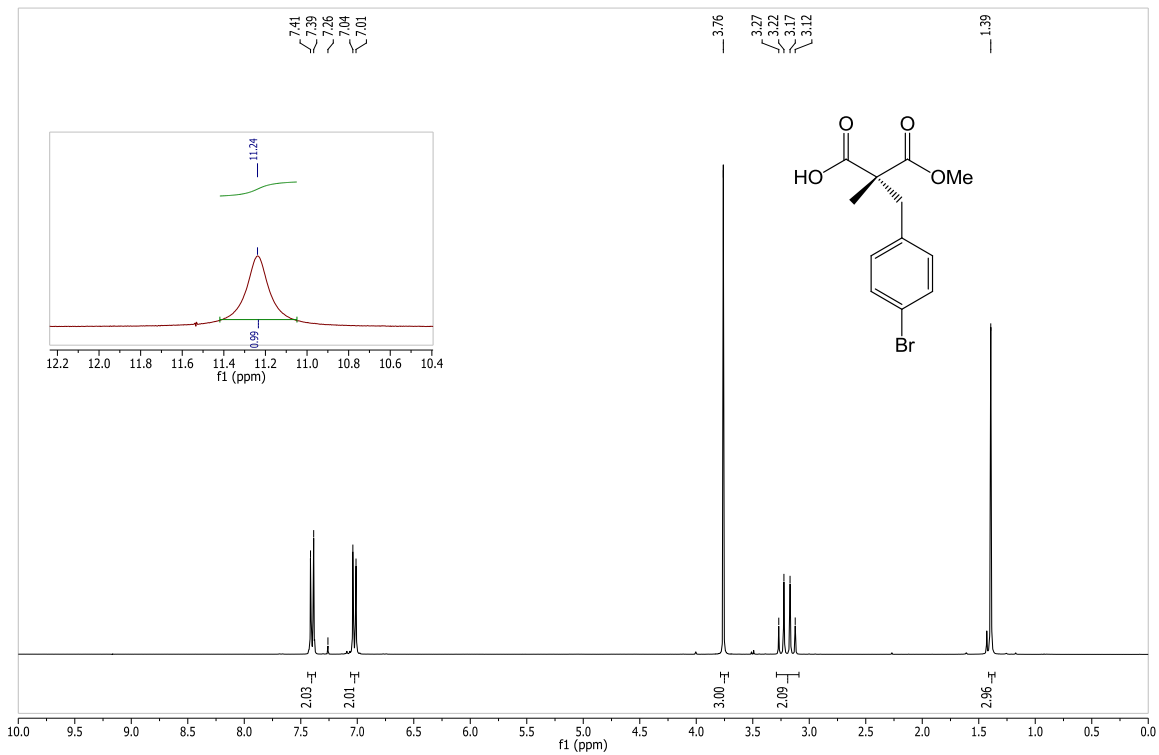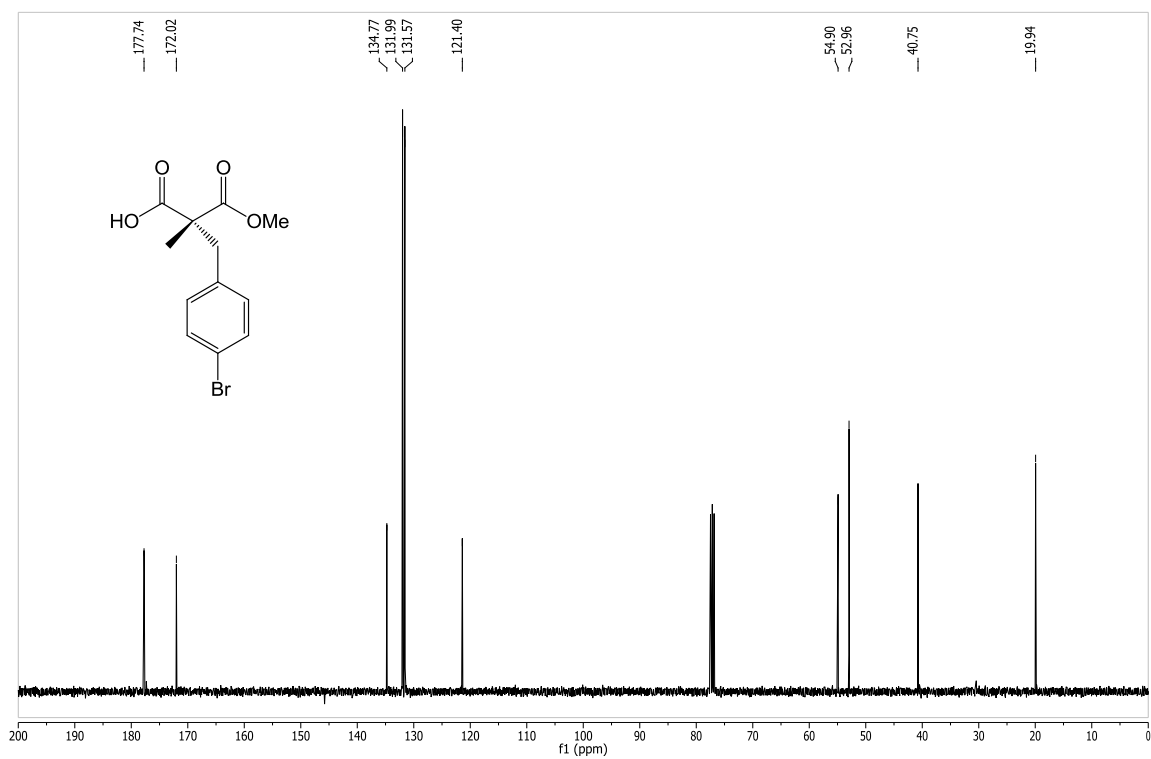

**$^1\text{H}$  NMR Spectrum of Racemic Half-Ester 4 with 1 Equiv of (*R*)-(+)- $\alpha$ -Methylbenzylamine (CDCl<sub>3</sub>)**

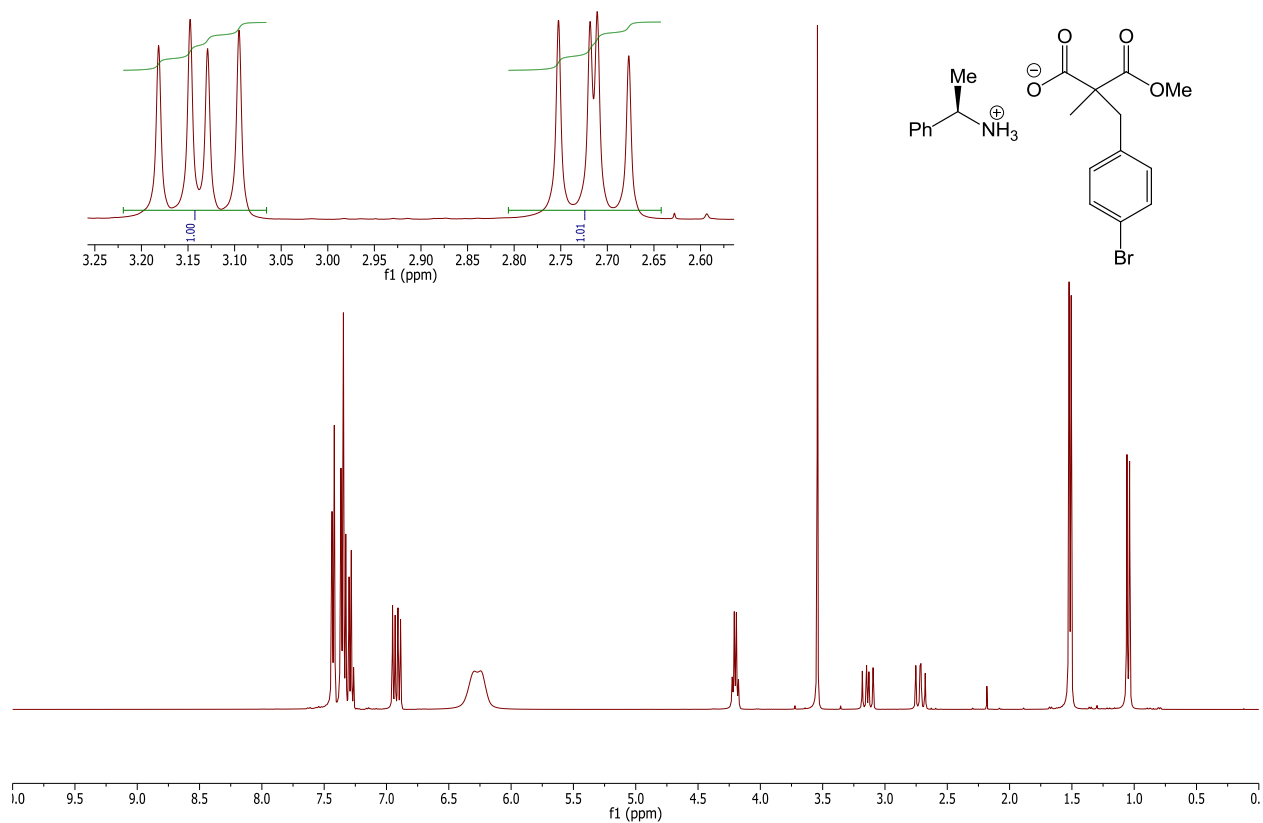

**$^1\text{H}$  NMR Spectrum of Recrystallized Enantiopure Half-Ester 4 with 1 Equiv of (*R*)-(+)- $\alpha$ -methylbenzylamine (CDCl<sub>3</sub>)**

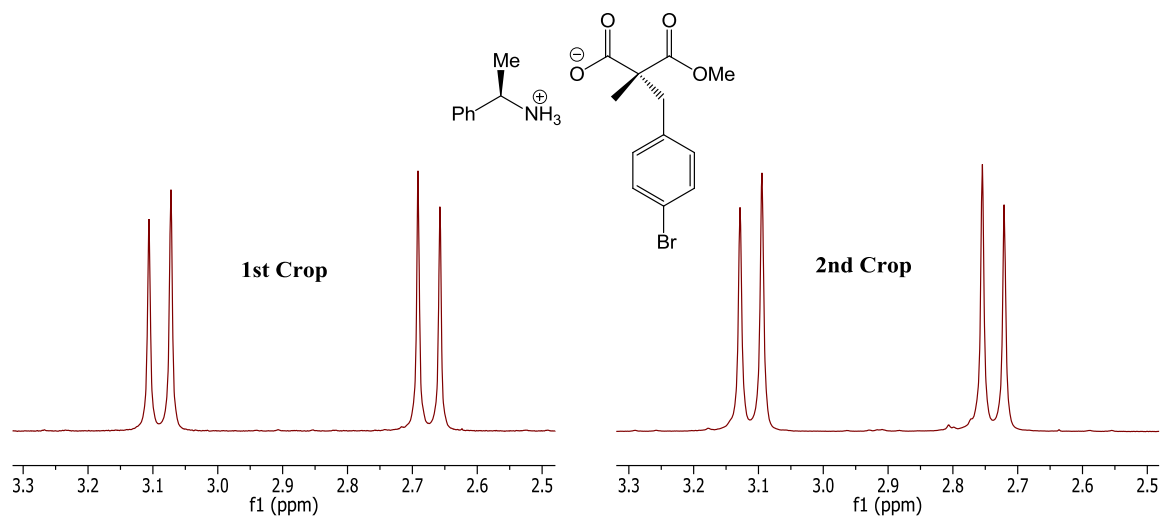

**$^1\text{H}$  and  $^{13}\text{C}$  NMR Spectra of Compound 5 ( $\text{CDCl}_3$ )**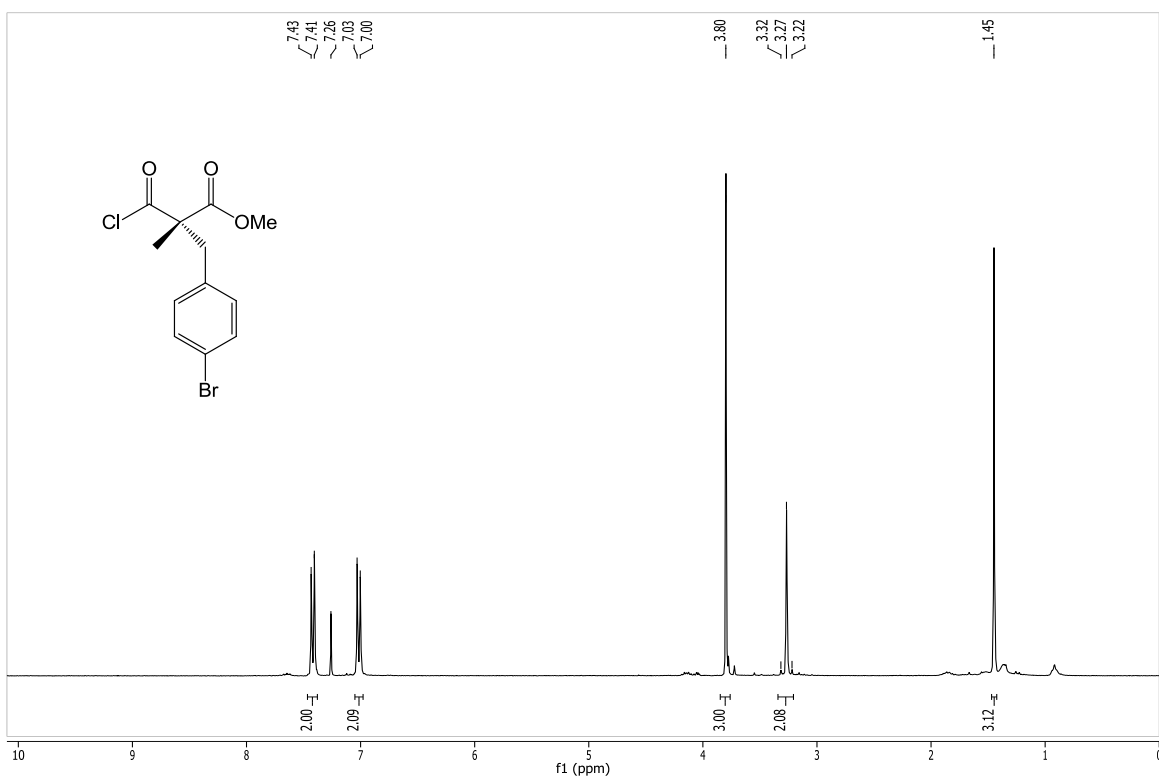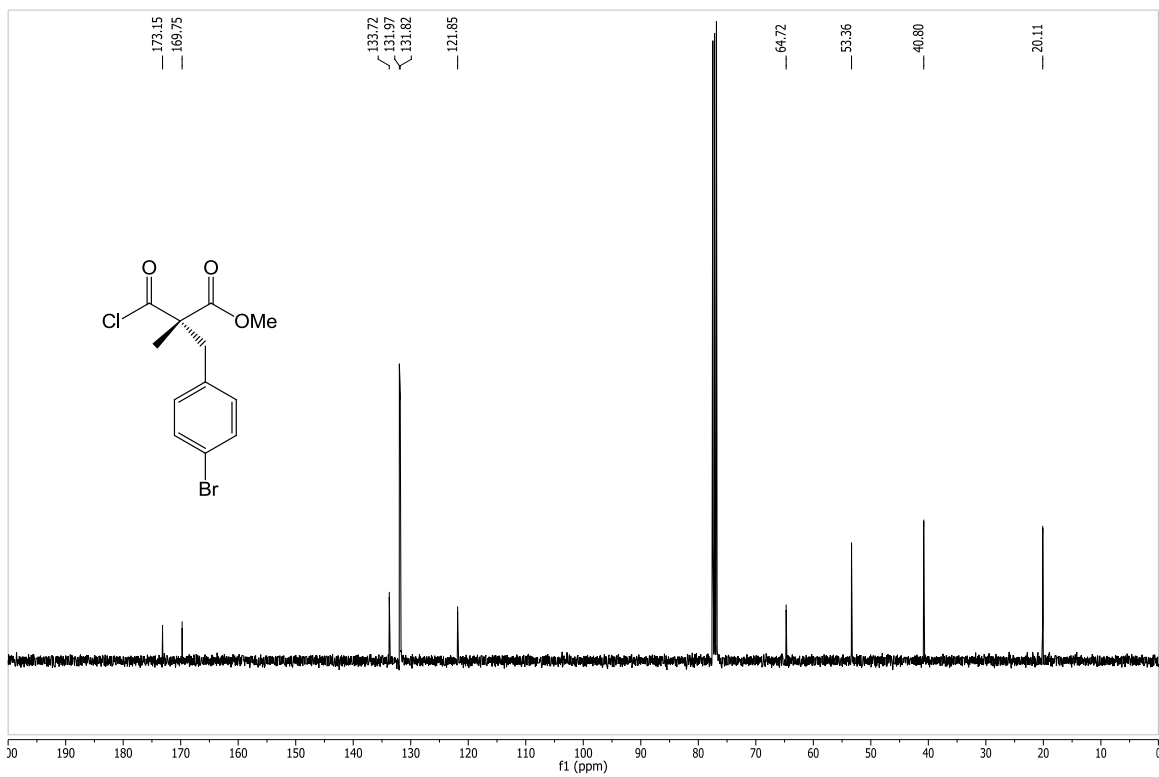

**$^1\text{H}$  and  $^{13}\text{C}$  NMR Spectra of Compound 6 ( $\text{CDCl}_3$ )**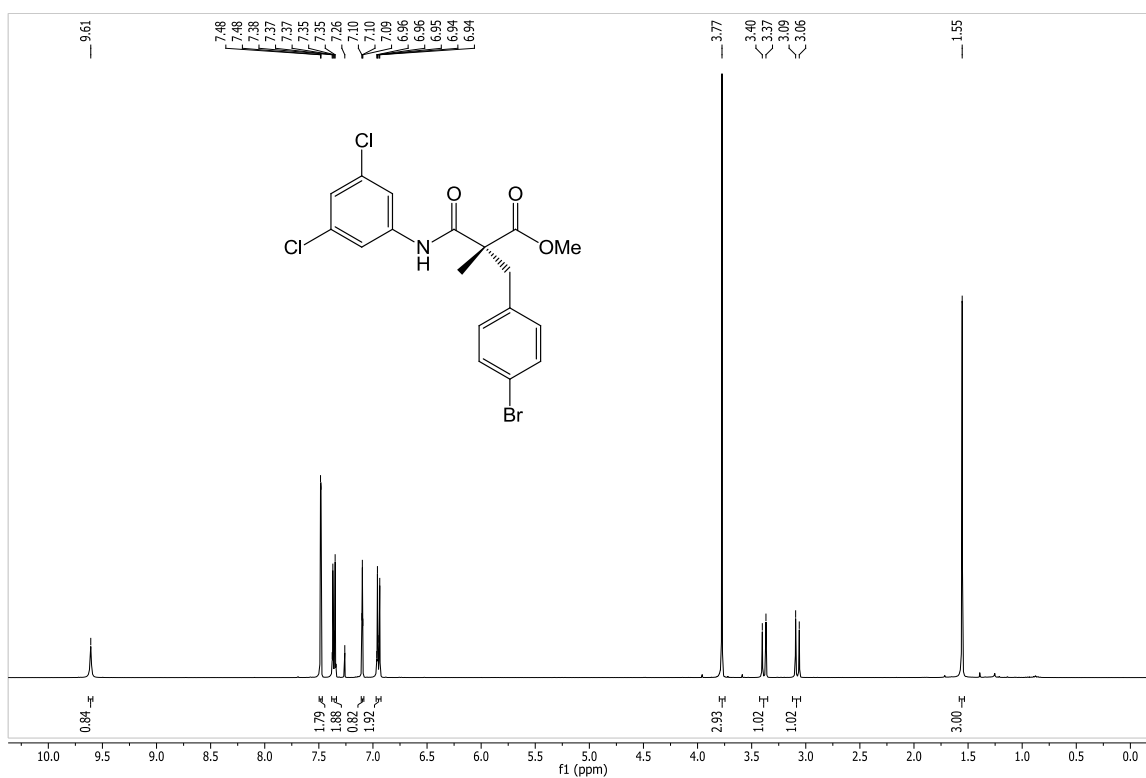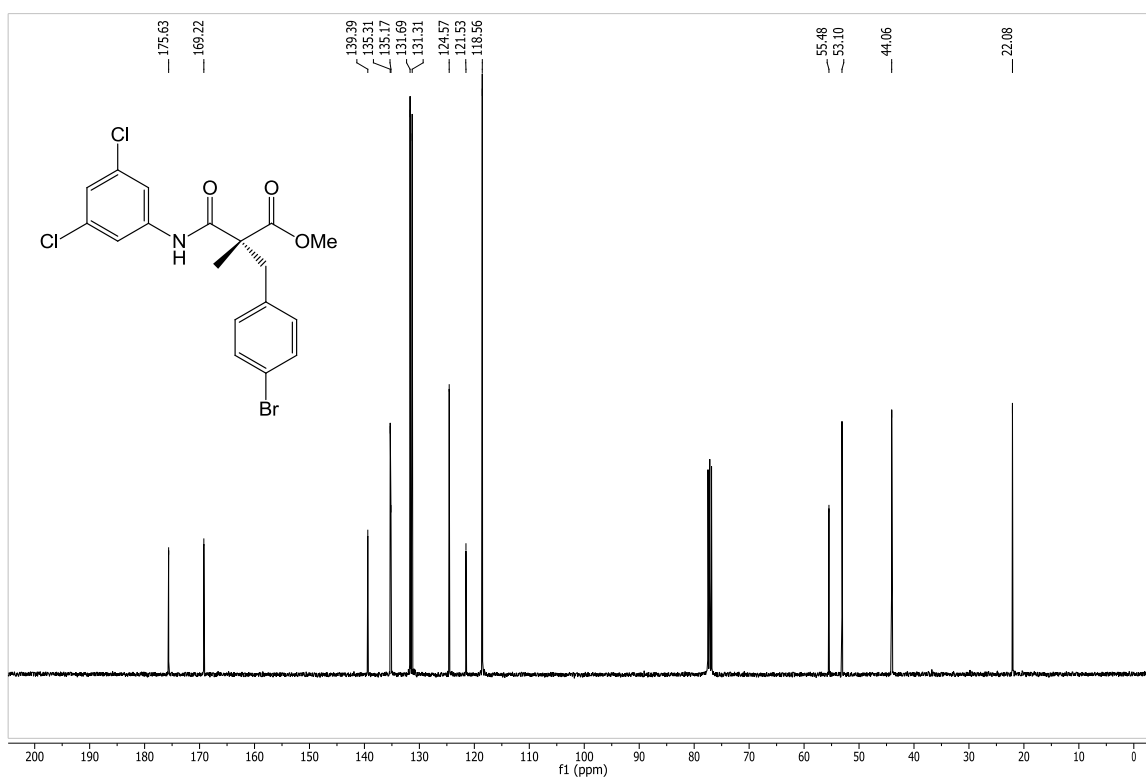

$^1\text{H}$  and  $^{13}\text{C}$  NMR Spectra of Compound 7 ( $\text{CD}_3\text{OD}$ )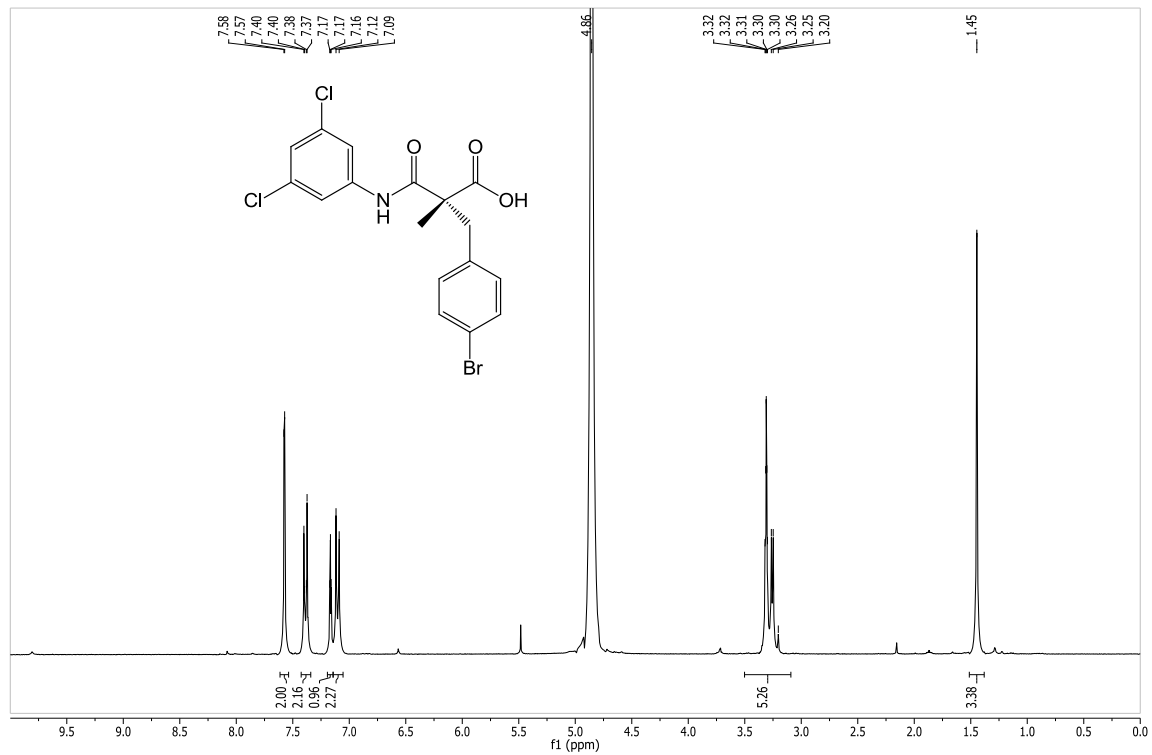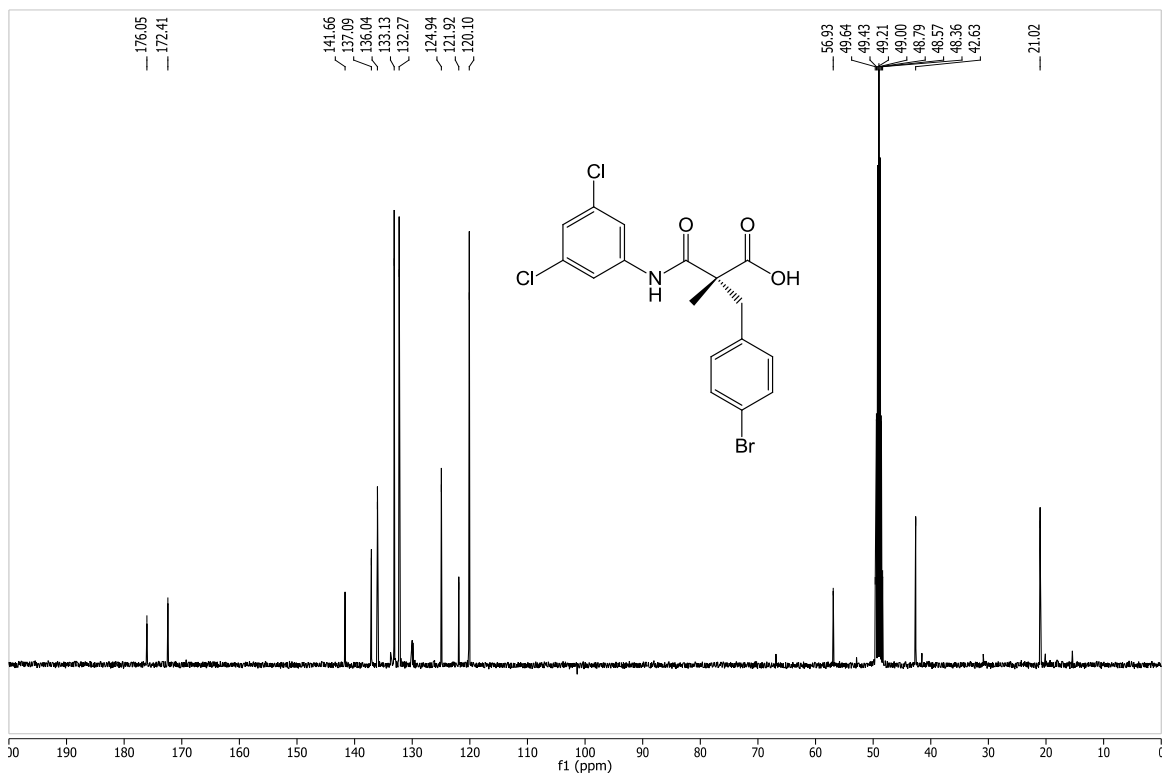

**$^1\text{H}$  and  $^{13}\text{C}$  NMR Spectra of Compound 8 ( $\text{CDCl}_3$ )**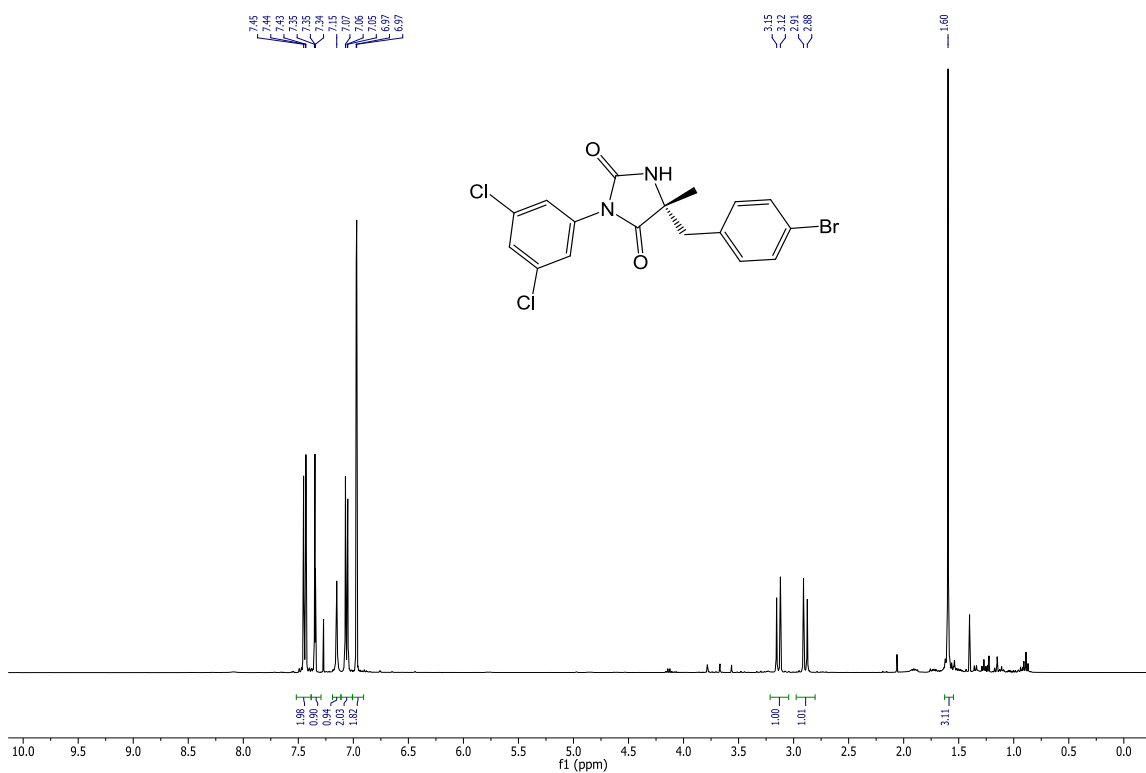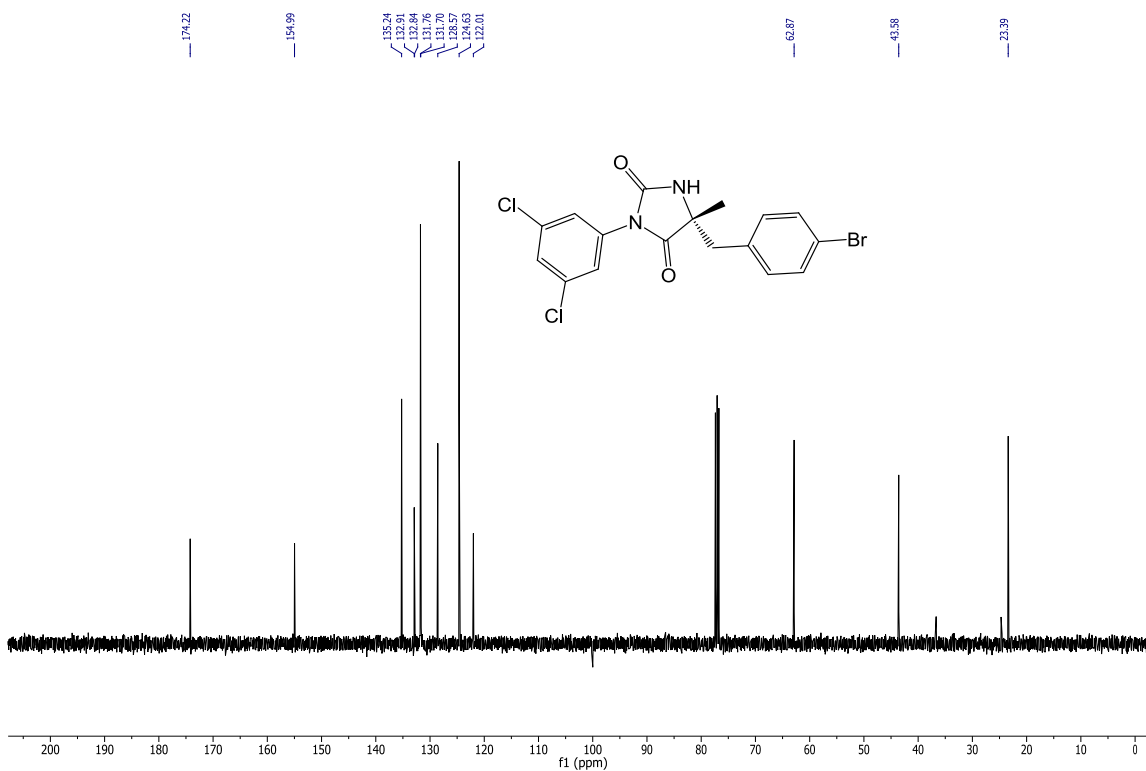



$^1\text{H}$  and  $^{13}\text{C}$  NMR Spectra of BIRT-377 (1) ( $\text{CDCl}_3$ )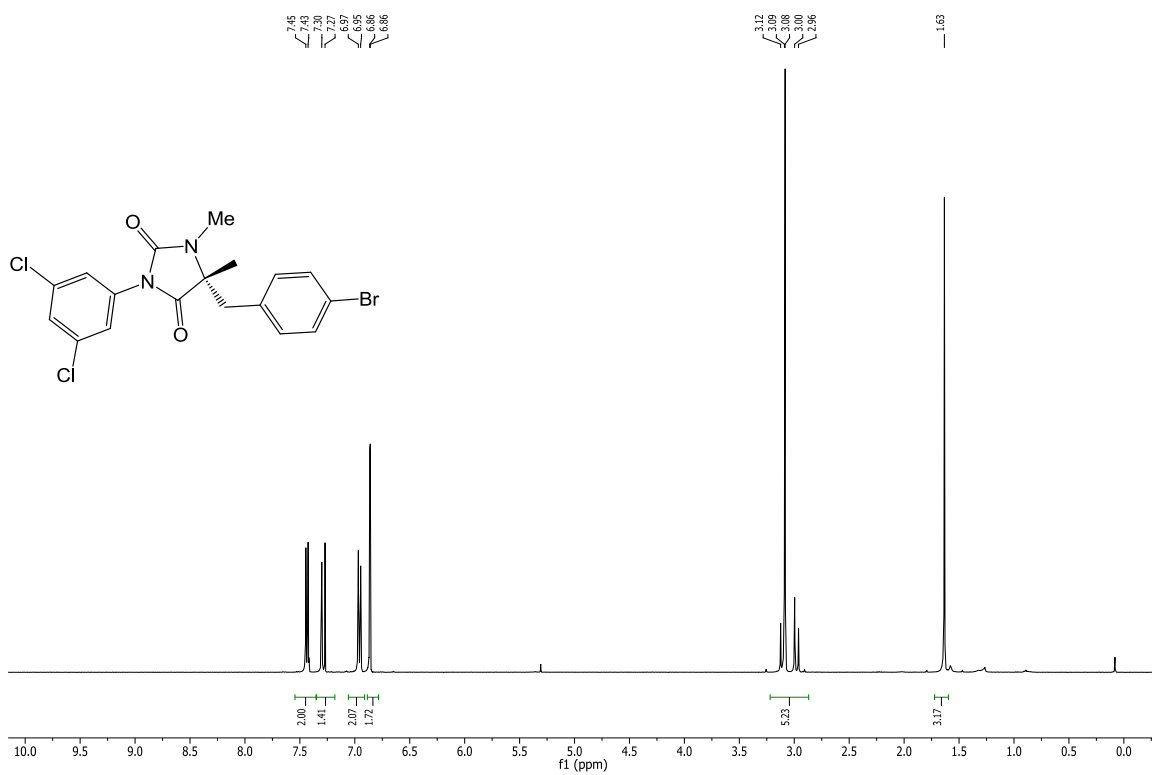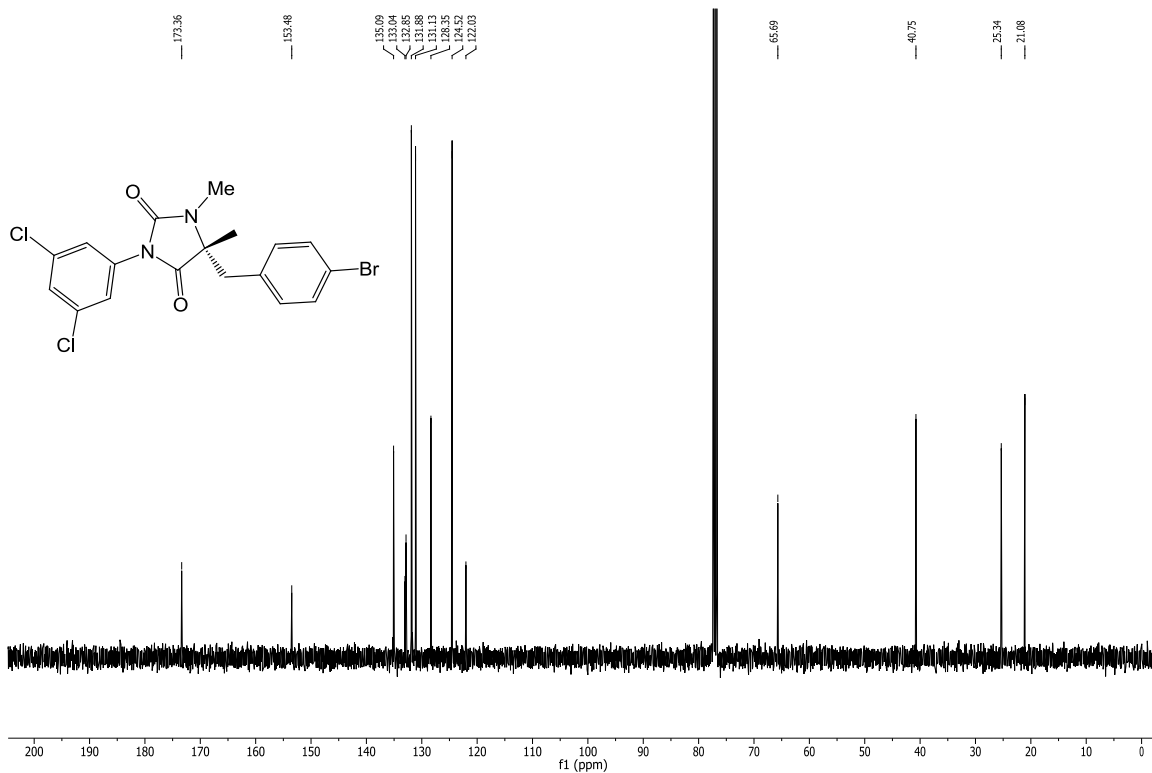

**$^1\text{H}$  and  $^{13}\text{C}$  NMR Spectra of Compound 9 ( $\text{CDCl}_3$ )**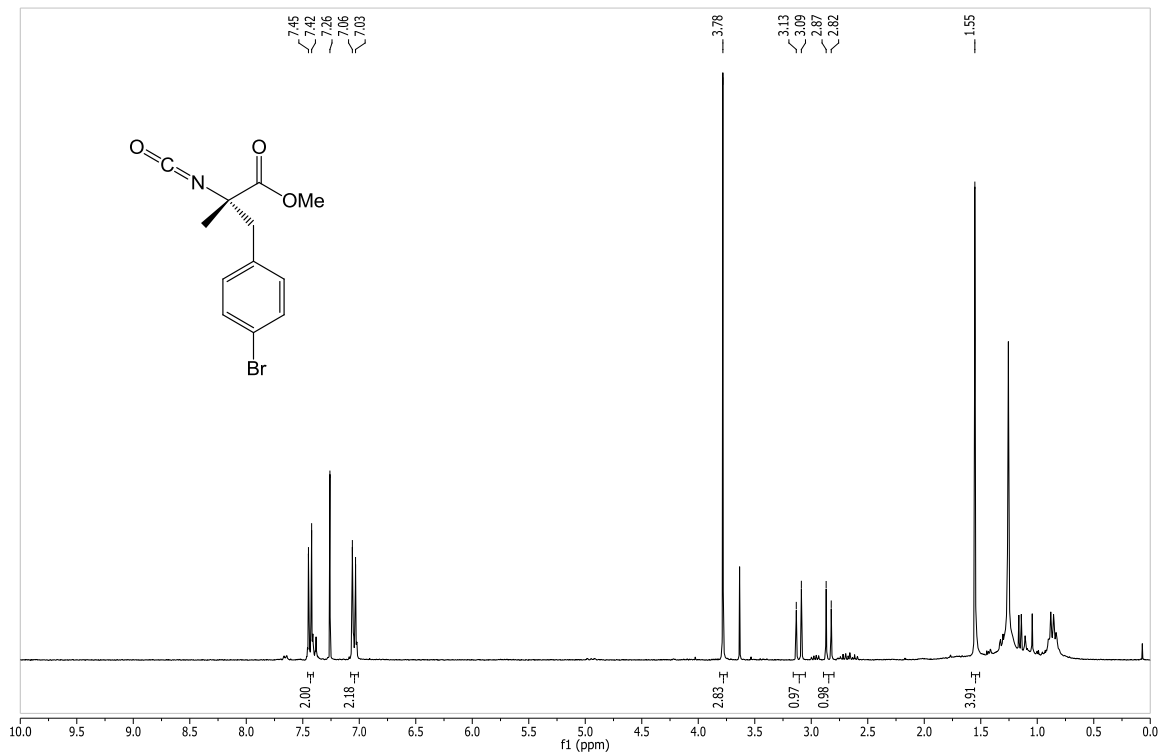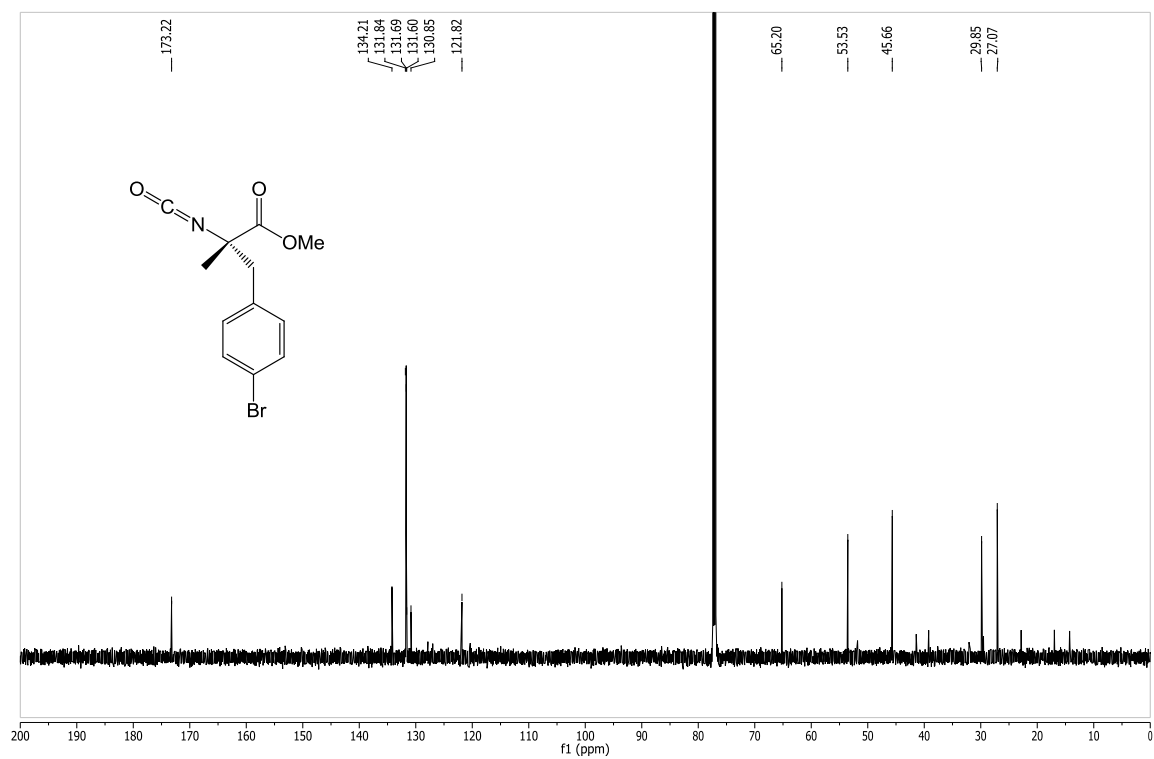

**$^1\text{H}$  and  $^{13}\text{C}$  NMR Spectra of Compound 10 ( $\text{CDCl}_3$ )**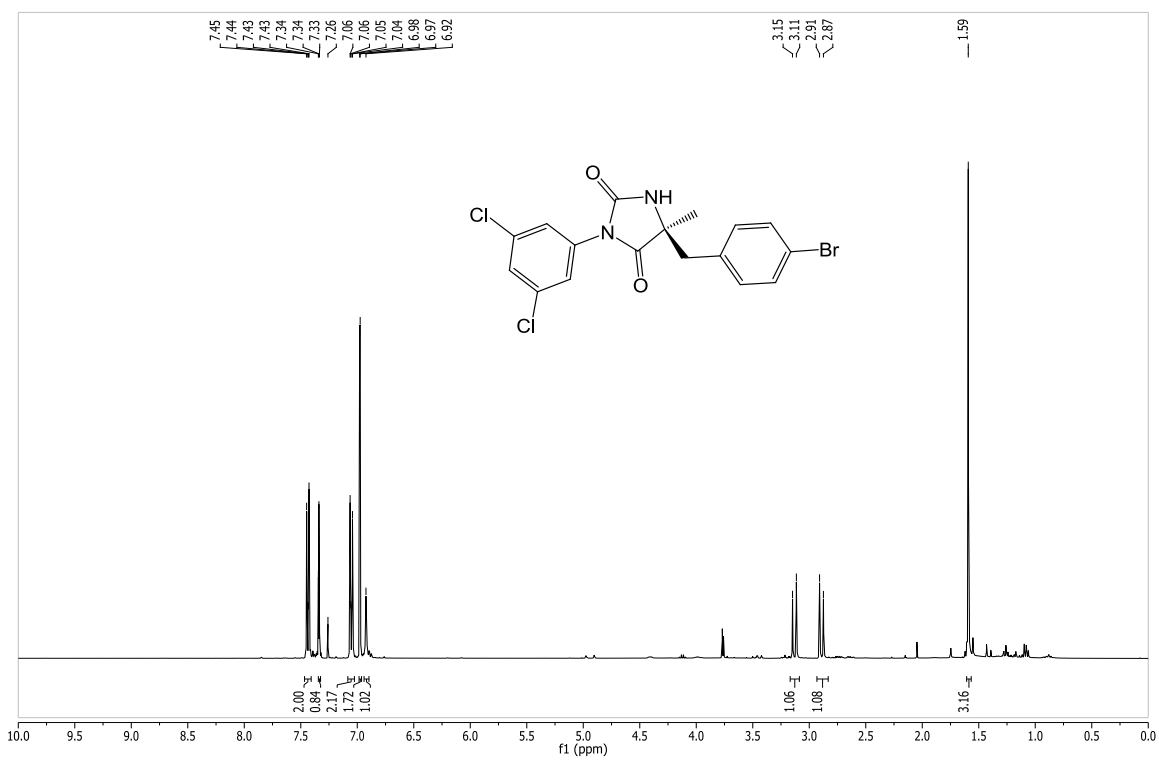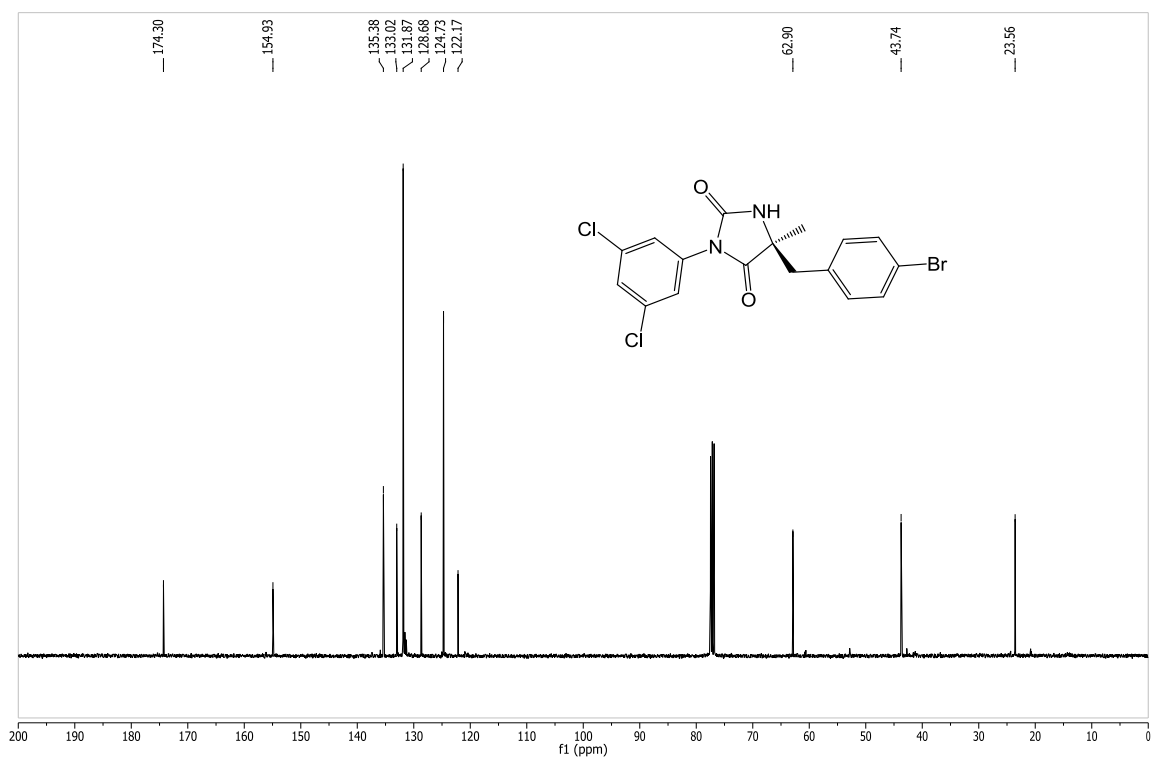

**$^1\text{H}$  and  $^{13}\text{C}$  NMR Spectra of (*ent*)-BIRT-377 (11) ( $\text{CDCl}_3$ )**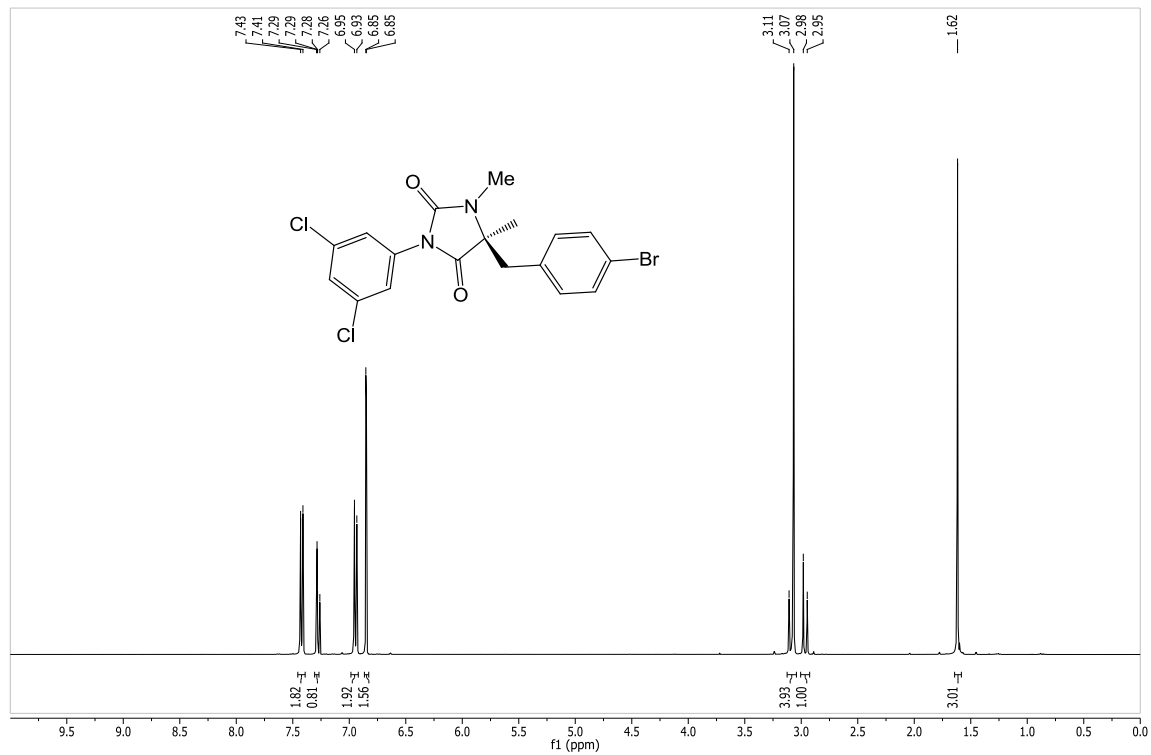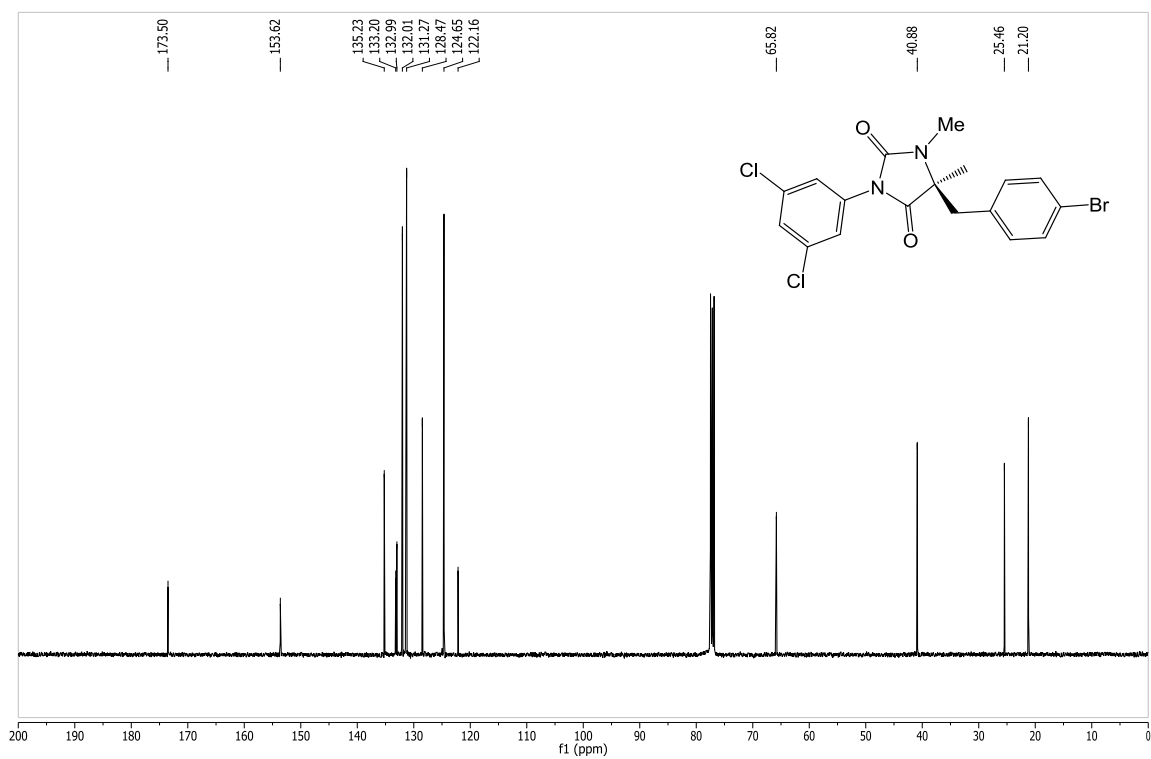

**$^1\text{H}$  and  $^{13}\text{C}$  NMR Spectra of Compound 12 ( $\text{CDCl}_3$ )**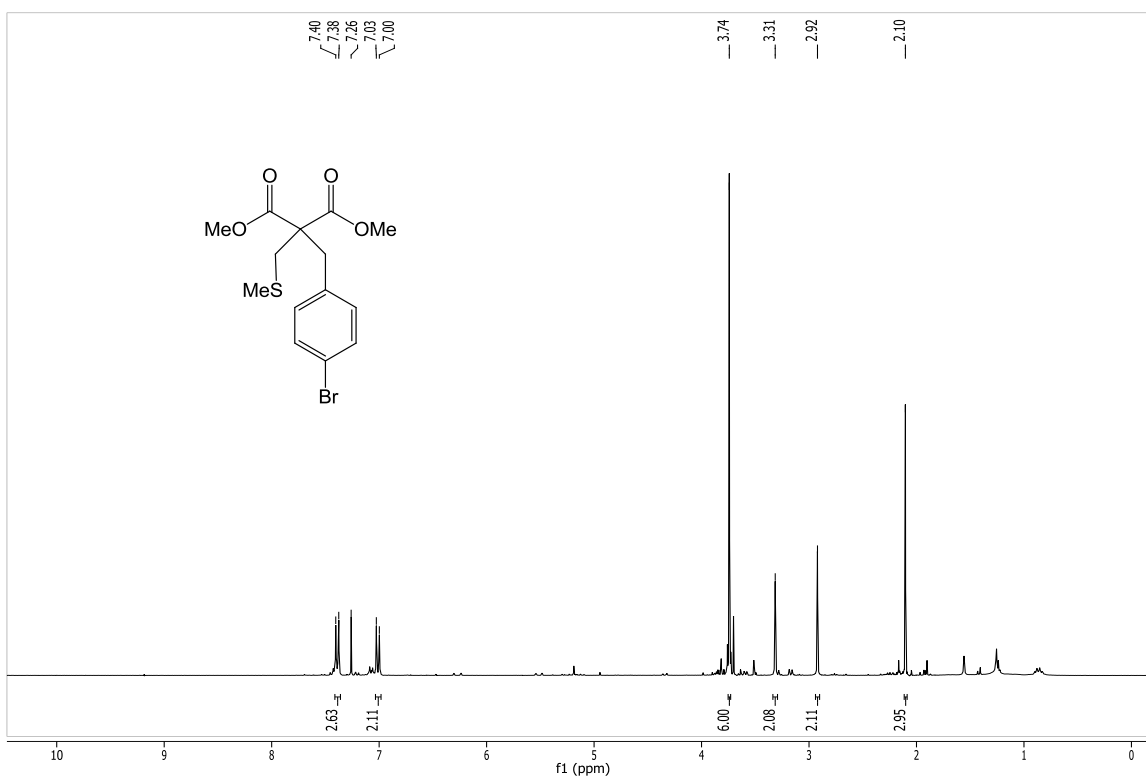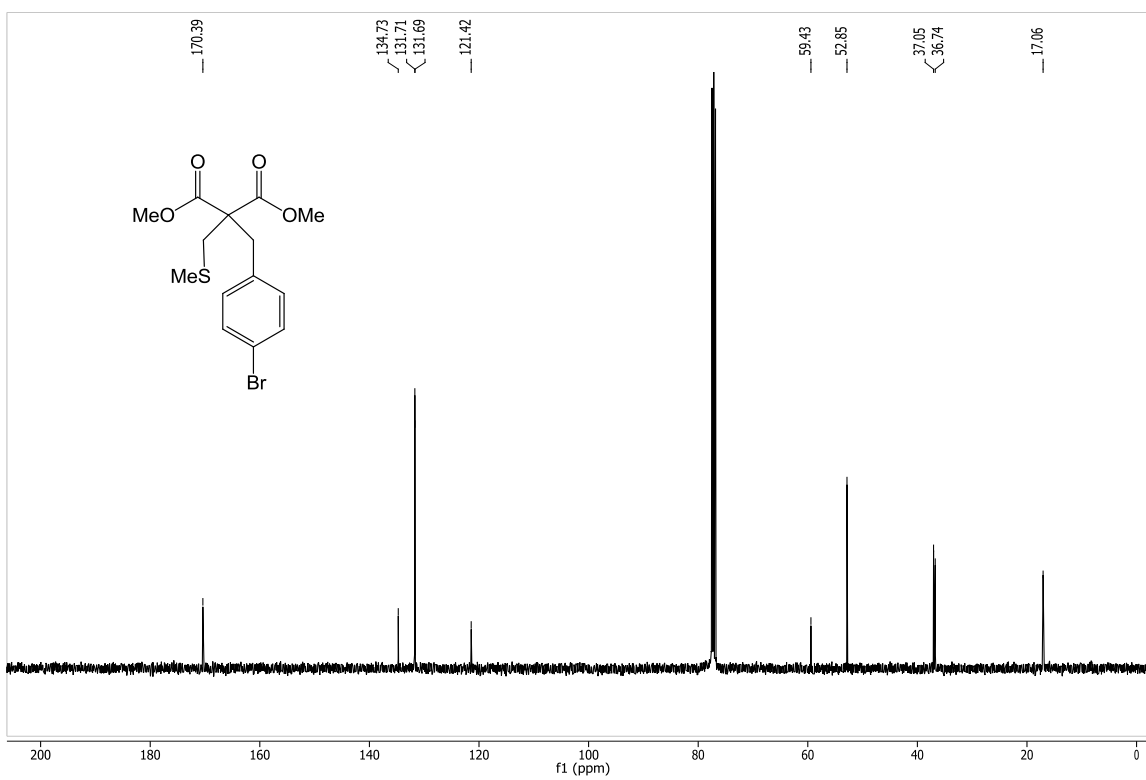

$^1\text{H}$  and  $^{13}\text{C}$  NMR Spectra of Compound 13 ( $\text{CDCl}_3$ )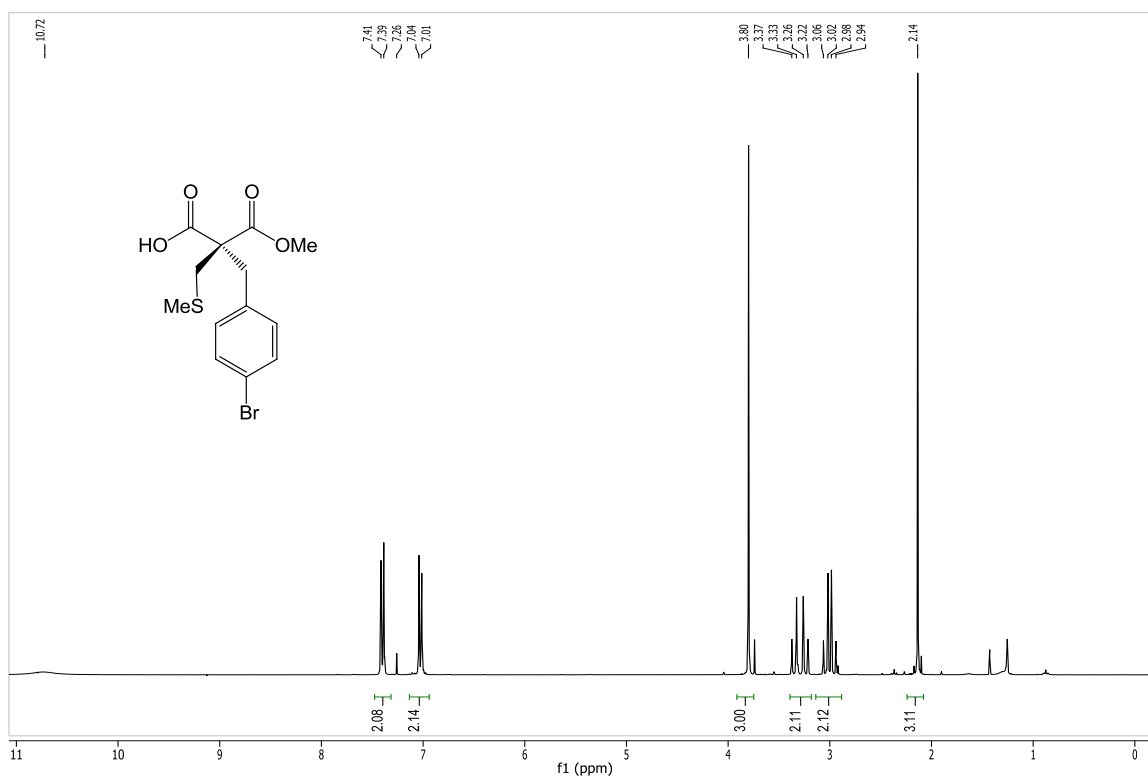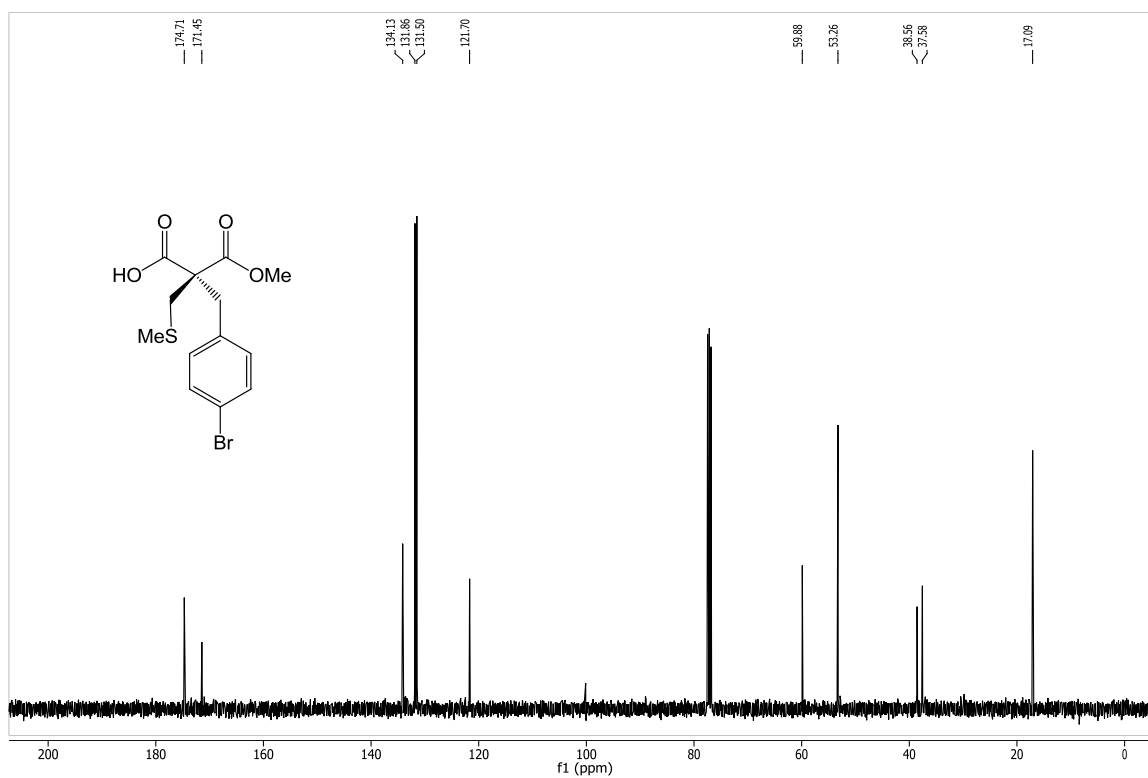

Supplement: c4ob02303j1.pdf [file c4ob02303j1.pdf]
